# Supplementary material
Source: PubMed Central journal article supplement (PMC9589925)
Supplement: NIHMS1838646-supplement-9.pdf [file NIHMS1838646-supplement-9.pdf]

## S1. EGFR Pareto Frontier

Table S1: All RESISTOR resistance mutation predictions for EGFR with erlotinib. “Pos” is the position of the residue. “WT AA” is the wildtype identity of the amino acid. “Mut AA” is the resistance mutation. “Sig Prob” is the mutational signature probability for the mutation from “WT AA” to “Mut AA” in lung adenocarcinoma. “ATP WT” and “ATP Mut” are the  $K^*$  scores of the endogenous ligand with the wildtype and mutant residues, respectively. “Drug WT” and “Drug Mut” are the  $K^*$  scores of erlotinib with the wildtype and mutant residues, respectively. “Count” is number of resistance mutations at the position. “Rank” is the Pareto rank of the mutation. Note:  $K^*$  scores are in  $\log_{10}$  units where possible and 0 where there is predicted to be no binding. The complete set of inputs used for the Pareto ranking can be found in Data S1.

| Pos | WT AA | Mut AA | Sig Prob | ATP WT | ATP Mut | Drug WT | Drug Mut | Count | Rank |
|-----|-------|--------|----------|--------|---------|---------|----------|-------|------|
| 718 | LEU   | PHE    | 0.000247 | 19.05  | 17.16   | 25.26   | 0        | 8     | 1    |
| 718 | LEU   | HIP    | 0.00042  | 19.05  | 18.86   | 25.26   | -62.44   | 8     | 1    |
| 718 | LEU   | HIE    | 0.00042  | 19.05  | 18.92   | 25.26   | -61.9    | 8     | 1    |
| 723 | PHE   | VAL    | 0.000316 | 19.06  | 19.14   | 25.20   | 0        | 5     | 1    |
| 723 | PHE   | LEU    | 0.00827  | 19.06  | 19.05   | 25.20   | 0        | 5     | 1    |
| 726 | VAL   | PHE    | 0.000509 | 19.04  | 19.71   | 25.24   | 0        | 2     | 1    |
| 743 | ALA   | ASP    | 0.0109   | 19.14  | 13.51   | 25.22   | 0        | 4     | 1    |
| 790 | THR   | LYS    | 0.00738  | 19.14  | 19.54   | 25.17   | 22.01    | 4     | 1    |
| 790 | THR   | MET    | 0.00602  | 19.14  | 19.79   | 25.17   | 23.89    | 4     | 1    |
| 791 | GLN   | PRO    | 0.0023   | 19.12  | 19.22   | 25.19   | 0        | 3     | 1    |
| 791 | GLN   | LYS    | 0.0163   | 19.12  | 19.1    | 25.19   | 0        | 3     | 1    |
| 796 | GLY   | TRP    | 2.06E-05 | 18.99  | 19.13   | 25.42   | 0        | 12    | 1    |
| 796 | GLY   | LEU    | 4.41E-05 | 18.99  | 19.55   | 25.42   | -25.46   | 12    | 1    |
| 796 | GLY   | GLU    | 0.000154 | 18.99  | 18.88   | 25.42   | 1.16     | 12    | 1    |
| 796 | GLY   | PHE    | 0.000176 | 18.99  | 19.48   | 25.42   | 4.68     | 12    | 1    |
| 796 | GLY   | ARG    | 0.00286  | 18.99  | 19.54   | 25.42   | 9.36     | 12    | 1    |
| 796 | GLY   | ASP    | 0.00532  | 18.99  | 19.15   | 25.42   | 18.29    | 12    | 1    |
| 796 | GLY   | CYS    | 0.00384  | 18.99  | 19.28   | 25.42   | 21.71    | 12    | 1    |
| 796 | GLY   | SER    | 0.00643  | 18.99  | 19.23   | 25.42   | 22.24    | 12    | 1    |
| 718 | LEU   | GLY    | 8.49E-06 | 19.05  | 18.15   | 25.26   | 0        | 8     | 2    |
| 718 | LEU   | TRP    | 1.75E-05 | 19.05  | 17.96   | 25.26   | 0        | 8     | 2    |
| 718 | LEU   | HID    | 0.00042  | 19.05  | 18.9    | 25.26   | -60.92   | 8     | 2    |
| 718 | LEU   | ARG    | 0.00238  | 19.05  | 19.41   | 25.26   | 22.5     | 8     | 2    |
| 726 | VAL   | TRP    | 4.82E-05 | 19.04  | 19.51   | 25.24   | 0        | 2     | 2    |
| 745 | LYS   | ILE    | 0.000243 | 18.98  | 19.05   | 25.18   | 0        | 5     | 2    |
| 745 | LYS   | MET    | 0.00516  | 18.98  | 18.97   | 25.18   | 0        | 5     | 2    |
| 790 | THR   | ARG    | 0.00139  | 19.14  | 19.32   | 25.17   | 11.4     | 4     | 2    |
| 791 | GLN   | GLY    | 1.81E-05 | 19.12  | 19.06   | 25.19   | 0        | 3     | 2    |
| 796 | GLY   | TYR    | 4.34E-05 | 18.99  | 19.48   | 25.42   | -13.32   | 12    | 2    |
| 796 | GLY   | ASN    | 5.25E-05 | 18.99  | 19.36   | 25.42   | 21       | 12    | 2    |
| 796 | GLY   | HIE    | 1.88E-05 | 18.99  | 19.55   | 25.42   | 23.68    | 12    | 2    |
| 800 | ASP   | GLY    | 0.00153  | 19.06  | 19.13   | 25.21   | 0        | 1     | 2    |
| 718 | LEU   | LYS    | 0.00027  | 19.05  | 19.22   | 25.26   | 22.98    | 8     | 3    |
| 723 | PHE   | ASP    | 8.41E-07 | 19.06  | 18.98   | 25.20   | 0        | 5     | 3    |
| 745 | LYS   | HIE    | 6.76E-05 | 18.98  | 18.85   | 25.18   | 0        | 5     | 3    |
| 745 | LYS   | THR    | 0.00126  | 18.98  | 18.71   | 25.18   | 0        | 5     | 3    |
| 790 | THR   | ASN    | 0.000219 | 19.14  | 19.16   | 25.17   | 21.87    | 4     | 3    |
| 793 | MET   | ASN    | 0.000104 | 19.04  | 18.93   | 25.16   | 0        | 1     | 3    |

| Pos | WT AA | Mut AA | Sig Prob | ATP WT | ATP Mut | Drug WT | Drug Mut | Count | Rank |
|-----|-------|--------|----------|--------|---------|---------|----------|-------|------|
| 796 | GLY   | THR    | 3.45E-05 | 18.99  | 19.28   | 25.42   | 16.88    | 12    | 3    |
| 844 | LEU   | TRP    | 1.9E-05  | 18.99  | 19.02   | 25.45   | -17.34   | 4     | 3    |
| 844 | LEU   | HID    | 0.00042  | 18.99  | 18.8    | 25.45   | 22.65    | 4     | 3    |
| 844 | LEU   | HIE    | 0.00042  | 18.99  | 18.74   | 25.45   | 22.63    | 4     | 3    |
| 854 | THR   | ASN    | 0.000262 | 19.01  | 19.09   | 25.43   | 21.08    | 1     | 3    |
| 723 | PHE   | ALA    | 5.72E-07 | 19.06  | 18.98   | 25.20   | 0        | 5     | 4    |
| 723 | PHE   | GLY    | 5.92E-07 | 19.06  | 18.91   | 25.20   | 0        | 5     | 4    |
| 743 | ALA   | CYS    | 7.34E-05 | 19.14  | 14.53   | 25.22   | 0        | 4     | 4    |
| 743 | ALA   | GLU    | 7.74E-05 | 19.14  | 4.17    | 25.22   | 0        | 4     | 4    |
| 745 | LYS   | HID    | 6.76E-05 | 18.98  | 18.81   | 25.18   | 0        | 5     | 4    |
| 844 | LEU   | HIP    | 0.00042  | 18.99  | 18.57   | 25.45   | 22.42    | 4     | 4    |
| 743 | ALA   | ARG    | 1.73E-05 | 19.14  | 6.55    | 25.22   | 0        | 4     | 5    |

Table S2: All RESISTOR resistance mutation predictions for EGFR with gefitinib. “Pos” is the position of the residue. “WT AA” is the wildtype identity of the amino acid. “Mut AA” is the resistance mutation. “Sig Prob” is the mutational signature probability for the mutation from “WT AA” to “Mut AA” in lung adenocarcinoma. “ATP WT” and “ATP Mut” are the  $K^*$  scores of the endogenous ligand with the wildtype and mutant residues, respectively. “Drug WT” and “Drug Mut” are the  $K^*$  scores of gefitinib with the wildtype and mutant residues, respectively. “Count” is number of resistance mutations at the position. “Rank” is the Pareto rank of the mutation. Note:  $K^*$  scores are in  $\log_{10}$  units where possible and 0 where there is predicted to be no binding. The complete set of inputs used for the Pareto ranking can be found in Data S2.

| Pos | WT AA | Mut AA | Sig Prob | ATP WT | ATP Mut | Drug WT | Drug Mut | Count | Rank |
|-----|-------|--------|----------|--------|---------|---------|----------|-------|------|
| 718 | LEU   | PHE    | 0.000247 | 19.05  | 17.16   | 26.94   | -23.15   | 7     | 1    |
| 718 | LEU   | TRP    | 1.75E-05 | 19.05  | 17.96   | 26.94   | 1.76     | 7     | 1    |
| 718 | LEU   | HIP    | 0.00042  | 19.05  | 18.86   | 26.94   | 4.5      | 7     | 1    |
| 718 | LEU   | HID    | 0.00042  | 19.05  | 18.9    | 26.94   | 4.92     | 7     | 1    |
| 718 | LEU   | HIE    | 0.00042  | 19.05  | 18.92   | 26.94   | 4.99     | 7     | 1    |
| 718 | LEU   | ARG    | 0.00238  | 19.05  | 19.41   | 26.94   | 23.69    | 7     | 1    |
| 743 | ALA   | GLU    | 7.74E-05 | 19.14  | 4.17    | 26.93   | -49.27   | 2     | 1    |
| 777 | LEU   | HID    | 0.000281 | 19.05  | 19.04   | 26.86   | 0        | 1     | 1    |
| 790 | THR   | ARG    | 0.00139  | 19.14  | 19.32   | 26.95   | 12.73    | 4     | 1    |
| 790 | THR   | LYS    | 0.00738  | 19.14  | 19.54   | 26.95   | 23.21    | 4     | 1    |
| 790 | THR   | MET    | 0.00602  | 19.14  | 19.79   | 26.95   | 25.06    | 4     | 1    |
| 796 | GLY   | LEU    | 4.41E-05 | 18.99  | 19.55   | 26.88   | 22.57    | 1     | 1    |
| 844 | LEU   | TRP    | 1.9E-05  | 18.99  | 19.02   | 26.97   | -28.99   | 4     | 1    |
| 718 | LEU   | LYS    | 0.00027  | 19.05  | 19.22   | 26.94   | 24.45    | 7     | 2    |
| 726 | VAL   | PHE    | 0.000509 | 19.04  | 19.71   | 26.94   | 25.26    | 1     | 2    |
| 743 | ALA   | ARG    | 1.73E-05 | 19.14  | 6.55    | 26.93   | -4.31    | 2     | 2    |
| 745 | LYS   | ILE    | 0.000243 | 18.98  | 19.05   | 26.88   | 16.99    | 1     | 2    |
| 790 | THR   | ASN    | 0.000219 | 19.14  | 19.16   | 26.95   | 23.52    | 4     | 2    |
| 844 | LEU   | HIP    | 0.00042  | 18.99  | 18.57   | 26.97   | 23.69    | 4     | 2    |
| 844 | LEU   | HID    | 0.00042  | 18.99  | 18.8    | 26.97   | 23.97    | 4     | 2    |
| 844 | LEU   | HIE    | 0.00042  | 18.99  | 18.74   | 26.97   | 23.94    | 4     | 2    |
| 854 | THR   | ASN    | 0.000262 | 19.01  | 19.09   | 26.98   | 20.61    | 1     | 2    |

Table S3: All RESISTOR resistance mutation predictions for EGFR with osimertinib. “Pos” is the position of the residue. “WT AA” is the wildtype identity of the amino acid. “Mut AA” is the resistance mutation. “Sig Prob” is the mutational signature probability for the mutation from “WT AA” to “Mut AA” in lung adenocarcinoma. “ATP WT” and “ATP Mut” are the  $K^*$  scores of the endogenous ligand with the wildtype and mutant residues, respectively. “Drug WT” and “Drug Mut” are the  $K^*$  scores of osimertinib with the wildtype and mutant residues, respectively. “Count” is number of resistance mutations at the position. “Rank” is the Pareto rank of the mutation. Note:  $K^*$  scores are in  $\log_{10}$  units where possible and 0 where there is predicted to be no binding. The complete set of inputs used for the Pareto ranking can be found in Data S3.

| Pos | WT AA | Mut AA | Sig Prob | ATP WT | ATP Mut | Drug WT | Drug Mut | Count | Rank |
|-----|-------|--------|----------|--------|---------|---------|----------|-------|------|
| 718 | LEU   | TRP    | 1.75E-05 | 19.05  | 17.96   | 27.51   | 0        | 9     | 1    |
| 718 | LEU   | PHE    | 0.000247 | 19.05  | 17.16   | 27.51   | 0        | 9     | 1    |
| 718 | LEU   | HIP    | 0.00042  | 19.05  | 18.86   | 27.51   | -38.77   | 9     | 1    |
| 718 | LEU   | HIE    | 0.00042  | 19.05  | 18.92   | 27.51   | -38.57   | 9     | 1    |
| 718 | LEU   | MET    | 0.0108   | 19.05  | 19.44   | 27.51   | 25.52    | 9     | 1    |
| 719 | GLY   | VAL    | 0.017    | 19.05  | 14.7    | 27.50   | 20.75    | 2     | 1    |
| 726 | VAL   | TRP    | 4.82E-05 | 19.04  | 19.51   | 27.48   | 0        | 3     | 1    |
| 743 | ALA   | ASP    | 0.0109   | 19.14  | 13.51   | 27.43   | 17.5     | 3     | 1    |
| 796 | GLY   | TRP    | 2.06E-05 | 18.99  | 19.13   | 27.38   | -97.39   | 14    | 1    |
| 796 | GLY   | TYR    | 4.34E-05 | 18.99  | 19.48   | 27.38   | -61.59   | 14    | 1    |
| 796 | GLY   | PHE    | 0.000176 | 18.99  | 19.48   | 27.38   | -41.78   | 14    | 1    |
| 796 | GLY   | LEU    | 4.41E-05 | 18.99  | 19.55   | 27.38   | -3.75    | 14    | 1    |
| 796 | GLY   | ARG    | 0.00286  | 18.99  | 19.54   | 27.38   | 10.61    | 14    | 1    |
| 796 | GLY   | ASP    | 0.00532  | 18.99  | 19.15   | 27.38   | 14.96    | 14    | 1    |
| 796 | GLY   | CYS    | 0.00384  | 18.99  | 19.28   | 27.38   | 21.85    | 14    | 1    |
| 796 | GLY   | SER    | 0.00643  | 18.99  | 19.23   | 27.38   | 24.76    | 14    | 1    |
| 718 | LEU   | HID    | 0.00042  | 19.05  | 18.9    | 27.51   | -37.61   | 9     | 2    |
| 718 | LEU   | ARG    | 0.00238  | 19.05  | 19.41   | 27.51   | 20.16    | 9     | 2    |
| 723 | PHE   | ILE    | 0.00209  | 19.06  | 19.5    | 27.45   | 25.68    | 1     | 2    |
| 792 | LEU   | HIP    | 0.00486  | 19.03  | 18.88   | 27.47   | 24.98    | 3     | 2    |
| 792 | LEU   | HIE    | 0.00486  | 19.03  | 18.93   | 27.47   | 25.07    | 3     | 2    |
| 792 | LEU   | HID    | 0.00486  | 19.03  | 18.98   | 27.47   | 25.15    | 3     | 2    |
| 796 | GLY   | GLU    | 0.000154 | 18.99  | 18.88   | 27.38   | 2.49     | 14    | 2    |
| 796 | GLY   | HIE    | 1.88E-05 | 18.99  | 19.55   | 27.38   | 11.32    | 14    | 2    |
| 796 | GLY   | ASN    | 5.25E-05 | 18.99  | 19.36   | 27.38   | 18.38    | 14    | 2    |
| 718 | LEU   | LYS    | 0.00027  | 19.05  | 19.22   | 27.51   | 24.7     | 9     | 3    |
| 719 | GLY   | THR    | 4.02E-05 | 19.05  | 17.76   | 27.50   | 20.4     | 2     | 3    |
| 726 | VAL   | ARG    | 2.32E-05 | 19.04  | 17.68   | 27.48   | 21.62    | 3     | 3    |
| 726 | VAL   | LYS    | 5.39E-05 | 19.04  | 17.07   | 27.48   | 21.87    | 3     | 3    |
| 743 | ALA   | GLU    | 7.74E-05 | 19.14  | 4.17    | 27.43   | 0.47     | 3     | 3    |
| 796 | GLY   | HID    | 1.88E-05 | 18.99  | 19.49   | 27.38   | 11.69    | 14    | 3    |
| 796 | GLY   | THR    | 3.45E-05 | 18.99  | 19.28   | 27.38   | 22.43    | 14    | 3    |
| 844 | LEU   | TRP    | 1.9E-05  | 18.99  | 19.02   | 27.56   | 22.12    | 1     | 3    |
| 796 | GLY   | HIP    | 1.88E-05 | 18.99  | 19.46   | 27.38   | 12.09    | 14    | 4    |
| 718 | LEU   | GLY    | 8.49E-06 | 19.05  | 18.15   | 27.51   | 24.02    | 9     | 5    |
| 743 | ALA   | ARG    | 1.73E-05 | 19.14  | 6.55    | 27.43   | 12.58    | 3     | 5    |

## S2. BRAF Pareto Frontier

Table S4: All RESISTOR resistance mutation predictions for BRAF with dabrafenib. “Pos” is the position of the residue. “WT AA” is the wildtype identity of the amino acid. “Mut AA” is the resistance mutation. “Sig Prob” is the mutational signature probability for the mutation from “WT AA” to “Mut AA” in melanoma. “ATP WT” and “ATP Mut” are the  $K^*$  scores of the endogenous ligand with the wildtype and mutant residues, respectively. “Drug WT” and “Drug Mut” are the  $K^*$  scores of dabrafenib with the wildtype and mutant residues, respectively. “Count” is number of resistance mutations at the position. “Rank” is the Pareto rank of the mutation. Note:  $K^*$  scores are in  $\log_{10}$  units where possible and 0 where there is predicted to be no binding. The complete set of inputs used for the Pareto ranking can be found in Data S4.

| Pos | WT AA | Mut AA | Sig Prob | ATP WT | ATP Mut | Drug WT | Drug Mut | Count | Rank |
|-----|-------|--------|----------|--------|---------|---------|----------|-------|------|
| 466 | GLY   | ARG    | 5.84E-02 | 18.80  | 10.53   | 37.16   | -167.92  | 11    | 1    |
| 466 | GLY   | LYS    | 2.38E-02 | 18.80  | 11.79   | 37.16   | -52.4    | 11    | 1    |
| 466 | GLY   | GLU    | 2.19E-01 | 18.80  | 12.89   | 37.16   | 21.32    | 11    | 1    |
| 471 | VAL   | LEU    | 4.43E-04 | 18.65  | 19.67   | 37.26   | 25.1     | 6     | 1    |
| 508 | THR   | ARG    | 2.95E-04 | 18.59  | 18.59   | 37.23   | -118.81  | 4     | 1    |
| 535 | SER   | PRO    | 1.30E-03 | 18.72  | 18.65   | 37.26   | 0        | 1     | 1    |
| 593 | GLY   | PHE    | 1.99E-06 | 18.66  | 20.07   | 37.17   | 0        | 16    | 1    |
| 593 | GLY   | TYR    | 3.58E-05 | 18.66  | 19.86   | 37.17   | 0        | 16    | 1    |
| 593 | GLY   | ARG    | 7.80E-04 | 18.66  | 16.17   | 37.17   | 0        | 16    | 1    |
| 593 | GLY   | GLU    | 2.76E-04 | 18.66  | 18.73   | 37.17   | -60.32   | 16    | 1    |
| 593 | GLY   | ASN    | 1.34E-03 | 18.66  | 19.16   | 37.17   | -39.82   | 16    | 1    |
| 593 | GLY   | ASP    | 1.63E-02 | 18.66  | 18.89   | 37.17   | -29.79   | 16    | 1    |
| 593 | GLY   | CYS    | 1.66E-03 | 18.66  | 19.06   | 37.17   | 17.46    | 16    | 1    |
| 593 | GLY   | VAL    | 9.35E-04 | 18.66  | 19.18   | 37.17   | 28.45    | 16    | 1    |
| 593 | GLY   | ILE    | 4.55E-05 | 18.66  | 19.8    | 37.17   | 30.24    | 16    | 1    |
| 593 | GLY   | SER    | 6.09E-02 | 18.66  | 18.83   | 37.17   | 34.27    | 16    | 1    |
| 466 | GLY   | GLN    | 7.24E-05 | 18.80  | 12.55   | 37.16   | 11.37    | 11    | 2    |
| 466 | GLY   | ASP    | 7.51E-04 | 18.80  | 17.06   | 37.16   | 18.64    | 11    | 2    |
| 466 | GLY   | VAL    | 2.51E-03 | 18.80  | 13.44   | 37.16   | 29.23    | 11    | 2    |
| 467 | SER   | PRO    | 7.37E-04 | 18.62  | 18.85   | 37.15   | 30.42    | 1     | 2    |
| 481 | ALA   | LYS    | 2.74E-04 | 18.58  | 17.32   | 36.98   | -4.22    | 8     | 2    |
| 481 | ALA   | LEU    | 7.06E-05 | 18.58  | 18.68   | 36.98   | 9.97     | 8     | 2    |
| 481 | ALA   | GLU    | 1.21E-03 | 18.58  | 17.92   | 36.98   | 22.11    | 8     | 2    |
| 505 | LEU   | ARG    | 8.61E-04 | 18.59  | 18.58   | 36.85   | 16.53    | 5     | 2    |
| 508 | THR   | LYS    | 9.16E-04 | 18.59  | 18.59   | 37.23   | 27.22    | 4     | 2    |
| 514 | LEU   | ARG    | 5.22E-05 | 18.57  | 17.18   | 37.10   | 21.32    | 12    | 2    |
| 514 | LEU   | ILE    | 1.65E-03 | 18.57  | 18.4    | 37.10   | 32.55    | 12    | 2    |
| 529 | THR   | PHE    | 3.77E-05 | 18.58  | 15.91   | 36.99   | -125.31  | 11    | 2    |
| 529 | THR   | MET    | 1.74E-05 | 18.58  | 18.65   | 36.99   | -8.16    | 11    | 2    |
| 529 | THR   | ASN    | 9.96E-04 | 18.58  | 18.55   | 36.99   | 34.54    | 11    | 2    |
| 593 | GLY   | HIE    | 1.66E-05 | 18.66  | 19.58   | 37.17   | 0        | 16    | 2    |
| 593 | GLY   | THR    | 2.67E-05 | 18.66  | 19.06   | 37.17   | 27.33    | 16    | 2    |
| 464 | GLY   | GLN    | 7.24E-05 | 18.58  | 2.95    | 37.09   | 11.05    | 1     | 3    |
| 466 | GLY   | THR    | 5.47E-05 | 18.80  | 14.85   | 37.16   | 29.21    | 11    | 3    |
| 481 | ALA   | ILE    | 5.14E-05 | 18.58  | 14.2    | 36.98   | 21.38    | 8     | 3    |
| 481 | ALA   | VAL    | 1.46E-03 | 18.58  | 17.77   | 36.98   | 33.45    | 8     | 3    |
| 505 | LEU   | SER    | 2.78E-05 | 18.59  | 18.58   | 36.85   | 35.02    | 5     | 3    |
| 514 | LEU   | PRO    | 1.21E-03 | 18.57  | 18.12   | 37.10   | 33.34    | 12    | 3    |

| Pos | WT AA | Mut AA | Sig Prob | ATP WT | ATP Mut | Drug WT | Drug Mut | Count | Rank |
|-----|-------|--------|----------|--------|---------|---------|----------|-------|------|
| 527 | ILE   | LEU    | 6.37E-05 | 18.60  | 18.61   | 37.30   | 33.5     | 1     | 3    |
| 593 | GLY   | HIP    | 1.66E-05 | 18.66  | 19.56   | 37.17   | 0        | 16    | 3    |
| 514 | LEU   | SER    | 2.27E-04 | 18.57  | 18.1    | 37.10   | 34.19    | 12    | 4    |
| 593 | GLY   | HID    | 1.66E-05 | 18.66  | 19.55   | 37.17   | 0        | 16    | 4    |
| 471 | VAL   | MET    | 8.44E-06 | 18.65  | 18.96   | 37.26   | 27.83    | 6     | 5    |
| 481 | ALA   | ARG    | 1.53E-05 | 18.58  | 17.02   | 36.98   | -15.13   | 8     | 5    |
| 481 | ALA   | ASP    | 4.39E-06 | 18.58  | 19.21   | 36.98   | 31.9     | 8     | 5    |
| 508 | THR   | GLU    | 1.05E-05 | 18.59  | 18.59   | 37.23   | 35       | 4     | 5    |
| 514 | LEU   | PHE    | 1.53E-05 | 18.57  | 18.19   | 37.10   | 0        | 12    | 5    |
| 578 | LYS   | TYR    | 5.24E-06 | 18.55  | 18.39   | 37.11   | -143.76  | 1     | 5    |
| 593 | GLY   | TRP    | 4.78E-06 | 18.66  | 18.83   | 37.17   | 0        | 16    | 5    |
| 593 | GLY   | LEU    | 3.87E-07 | 18.66  | 19.35   | 37.17   | -85.52   | 16    | 5    |
| 466 | GLY   | PRO    | 1.77E-07 | 18.80  | 18.27   | 37.16   | 0        | 11    | 6    |
| 466 | GLY   | TRP    | 2.10E-06 | 18.80  | 13.1    | 37.16   | 0        | 11    | 6    |
| 466 | GLY   | LEU    | 4.82E-06 | 18.80  | 9.74    | 37.16   | -39.41   | 11    | 6    |
| 466 | GLY   | CYS    | 3.82E-06 | 18.80  | 17.62   | 37.16   | 27.45    | 11    | 6    |
| 469 | GLY   | PRO    | 1.77E-07 | 18.60  | 18.75   | 37.10   | 0        | 1     | 6    |
| 471 | VAL   | PRO    | 5.74E-07 | 18.65  | 17.88   | 37.26   | 0        | 6     | 6    |
| 471 | VAL   | ARG    | 3.03E-07 | 18.65  | 18.99   | 37.26   | 23.05    | 6     | 6    |
| 471 | VAL   | GLU    | 9.01E-07 | 18.65  | 18.82   | 37.26   | 31.61    | 6     | 6    |
| 481 | ALA   | GLN    | 1.80E-06 | 18.58  | 18.37   | 36.98   | 15.47    | 8     | 6    |
| 508 | THR   | GLN    | 2.51E-06 | 18.59  | 18.59   | 37.23   | 33.59    | 4     | 6    |
| 513 | ILE   | ARG    | 1.06E-06 | 18.57  | 18.57   | 37.09   | -30.17   | 2     | 6    |
| 513 | ILE   | TYR    | 2.73E-06 | 18.57  | 18.57   | 37.09   | 27.86    | 2     | 6    |
| 514 | LEU   | HIP    | 3.37E-07 | 18.57  | 17.68   | 37.10   | 25.98    | 12    | 6    |
| 514 | LEU   | HID    | 3.37E-07 | 18.57  | 17.72   | 37.10   | 26.06    | 12    | 6    |
| 514 | LEU   | LYS    | 1.68E-06 | 18.57  | 17.37   | 37.10   | 32.25    | 12    | 6    |
| 514 | LEU   | MET    | 2.51E-06 | 18.57  | 18.42   | 37.10   | 33.68    | 12    | 6    |
| 528 | VAL   | ARG    | 5.57E-07 | 18.57  | 18.61   | 37.01   | -72.34   | 1     | 6    |
| 529 | THR   | TYR    | 1.12E-06 | 18.58  | 18.58   | 36.99   | -10.9    | 11    | 6    |
| 529 | THR   | ARG    | 4.98E-07 | 18.58  | 18.6    | 36.99   | -4.95    | 11    | 6    |
| 529 | THR   | LYS    | 1.74E-06 | 18.58  | 18.57   | 36.99   | 4.7      | 11    | 6    |
| 529 | THR   | LEU    | 3.10E-06 | 18.58  | 18.56   | 36.99   | 26.71    | 11    | 6    |
| 532 | CYS   | HID    | 4.44E-06 | 18.49  | 14.39   | 37.09   | 26.54    | 7     | 6    |
| 532 | CYS   | HIP    | 4.44E-06 | 18.49  | 14.51   | 37.09   | 26.79    | 7     | 6    |
| 532 | CYS   | HIE    | 4.44E-06 | 18.49  | 12.48   | 37.09   | 25.2     | 7     | 6    |
| 532 | CYS   | ILE    | 1.16E-06 | 18.49  | 18.82   | 37.09   | 34.28    | 7     | 6    |
| 532 | CYS   | VAL    | 2.11E-06 | 18.49  | 18.7    | 37.09   | 34.77    | 7     | 6    |
| 471 | VAL   | HID    | 6.58E-07 | 18.65  | 17.61   | 37.26   | 33.79    | 6     | 7    |
| 505 | LEU   | GLY    | 6.90E-08 | 18.59  | 18.58   | 36.85   | 34.62    | 5     | 7    |
| 505 | LEU   | GLN    | 1.84E-06 | 18.59  | 18.6    | 36.85   | 34.82    | 5     | 7    |
| 514 | LEU   | HIE    | 3.37E-07 | 18.57  | 17.72   | 37.10   | 27.35    | 12    | 7    |
| 514 | LEU   | GLY    | 3.88E-08 | 18.57  | 18.03   | 37.10   | 33.68    | 12    | 7    |
| 514 | LEU   | ALA    | 9.24E-07 | 18.57  | 18.09   | 37.10   | 34.25    | 12    | 7    |
| 529 | THR   | HID    | 6.68E-08 | 18.58  | 18.58   | 36.99   | -10.11   | 11    | 7    |
| 529 | THR   | HIE    | 6.68E-08 | 18.58  | 18.58   | 36.99   | -4.75    | 11    | 7    |
| 529 | THR   | ASP    | 2.37E-06 | 18.58  | 18.51   | 36.99   | 34.7     | 11    | 7    |

| Pos | WT AA | Mut AA | Sig Prob | ATP WT | ATP Mut | Drug WT | Drug Mut | Count | Rank |
|-----|-------|--------|----------|--------|---------|---------|----------|-------|------|
| 531 | TRP   | PRO    | 5.44E-07 | 18.51  | 16.76   | 37.07   | 0        | 1     | 7    |
| 505 | LEU   | ALA    | 5.28E-07 | 18.59  | 18.58   | 36.85   | 35       | 5     | 8    |
| 529 | THR   | HIP    | 6.68E-08 | 18.58  | 18.58   | 36.99   | -6.63    | 11    | 8    |

Table S5: All RESISTOR resistance mutation predictions for BRAF with vemurafenib. “Pos” is the position of the residue. “WT AA” is the wildtype identity of the amino acid. “Mut AA” is the resistance mutation. “Sig Prob” is the mutational signature probability for the mutation from “WT AA” to “Mut AA” in melanoma. “ATP WT” and “ATP Mut” are the  $K^*$  scores of the endogenous ligand with the wildtype and mutant residues, respectively. “Drug WT” and “Drug Mut” are the  $K^*$  scores of vemurafenib with the wildtype and mutant residues, respectively. “Count” is number of resistance mutations at the position. “Rank” is the Pareto rank of the mutation. Note:  $K^*$  scores are in  $\log_{10}$  units where possible and 0 where there is predicted to be no binding. The complete set of inputs used for the Pareto ranking can be found in Data S5.

| Pos | WT AA | Mut AA | Sig Prob | ATP WT | ATP Mut | Drug WT | Drug Mut | Count | Rank |
|-----|-------|--------|----------|--------|---------|---------|----------|-------|------|
| 471 | VAL   | LEU    | 0.000443 | 18.65  | 19.67   | 33.41   | 29.39    | 4     | 1    |
| 481 | ALA   | THR    | 0.0177   | 18.58  | 18.99   | 33.27   | 30.69    | 9     | 1    |
| 529 | THR   | ILE    | 0.0202   | 18.58  | 18.57   | 33.45   | 29.33    | 10    | 1    |
| 535 | SER   | PRO    | 0.0013   | 18.72  | 18.65   | 33.65   | 0        | 1     | 1    |
| 593 | GLY   | PHE    | 1.99E-06 | 18.66  | 20.07   | 33.47   | 0        | 16    | 1    |
| 593 | GLY   | TYR    | 3.58E-05 | 18.66  | 19.86   | 33.47   | 0        | 16    | 1    |
| 593 | GLY   | ARG    | 0.00078  | 18.66  | 16.17   | 33.47   | -231.93  | 16    | 1    |
| 593 | GLY   | ASN    | 0.00134  | 18.66  | 19.16   | 33.47   | -103.95  | 16    | 1    |
| 593 | GLY   | ASP    | 0.0163   | 18.66  | 18.89   | 33.47   | -26.78   | 16    | 1    |
| 593 | GLY   | CYS    | 0.00166  | 18.66  | 19.06   | 33.47   | 19.89    | 16    | 1    |
| 593 | GLY   | VAL    | 0.000935 | 18.66  | 19.18   | 33.47   | 21.09    | 16    | 1    |
| 593 | GLY   | ILE    | 4.55E-05 | 18.66  | 19.8    | 33.47   | 23.08    | 16    | 1    |
| 593 | GLY   | SER    | 0.0609   | 18.66  | 18.83   | 33.47   | 31.33    | 16    | 1    |
| 463 | ILE   | TYR    | 2.55E-05 | 18.60  | 15.94   | 33.42   | -124.43  | 4     | 2    |
| 481 | ALA   | GLU    | 0.00121  | 18.58  | 17.92   | 33.27   | 11.12    | 9     | 2    |
| 481 | ALA   | VAL    | 0.00146  | 18.58  | 17.77   | 33.27   | 28.52    | 9     | 2    |
| 505 | LEU   | PHE    | 0.00544  | 18.59  | 18.58   | 33.45   | 27.01    | 3     | 2    |
| 505 | LEU   | ARG    | 0.000861 | 18.59  | 18.58   | 33.45   | 27.41    | 3     | 2    |
| 508 | THR   | ARG    | 0.000295 | 18.59  | 18.59   | 33.45   | 12.91    | 2     | 2    |
| 508 | THR   | LYS    | 0.000916 | 18.59  | 18.59   | 33.45   | 21.18    | 2     | 2    |
| 514 | LEU   | ILE    | 0.00165  | 18.57  | 18.4    | 33.43   | 30.08    | 11    | 2    |
| 532 | CYS   | ARG    | 0.000812 | 18.49  | 13.04   | 33.28   | -10.66   | 9     | 2    |
| 593 | GLY   | HIE    | 1.66E-05 | 18.66  | 19.58   | 33.47   | 0        | 16    | 2    |
| 593 | GLY   | GLU    | 0.000276 | 18.66  | 18.73   | 33.47   | -12.82   | 16    | 2    |
| 593 | GLY   | THR    | 2.67E-05 | 18.66  | 19.06   | 33.47   | 20.72    | 16    | 2    |
| 481 | ALA   | LEU    | 7.06E-05 | 18.58  | 18.68   | 33.27   | 18.19    | 9     | 3    |
| 481 | ALA   | LYS    | 0.000274 | 18.58  | 17.32   | 33.27   | 18.46    | 9     | 3    |
| 514 | LEU   | ARG    | 5.22E-05 | 18.57  | 17.18   | 33.43   | 22.28    | 11    | 3    |
| 514 | LEU   | GLN    | 8.77E-05 | 18.57  | 17.02   | 33.43   | 27.9     | 11    | 3    |
| 514 | LEU   | SER    | 0.000227 | 18.57  | 18.1    | 33.43   | 30.81    | 11    | 3    |
| 529 | THR   | MET    | 1.74E-05 | 18.58  | 18.65   | 33.45   | -8.52    | 10    | 3    |
| 529 | THR   | PHE    | 3.77E-05 | 18.58  | 15.91   | 33.45   | 5.09     | 10    | 3    |
| 593 | GLY   | HIP    | 1.66E-05 | 18.66  | 19.56   | 33.47   | 0        | 16    | 3    |
| 481 | ALA   | ILE    | 5.14E-05 | 18.58  | 14.2    | 33.27   | 24.57    | 9     | 4    |

| Pos | WT AA | Mut AA | Sig Prob | ATP WT | ATP Mut | Drug WT | Drug Mut | Count | Rank |
|-----|-------|--------|----------|--------|---------|---------|----------|-------|------|
| 593 | GLY   | HID    | 1.66E-05 | 18.66  | 19.55   | 33.47   | 0        | 16    | 4    |
| 471 | VAL   | MET    | 8.44E-06 | 18.65  | 18.96   | 33.41   | 31.15    | 4     | 5    |
| 481 | ALA   | ARG    | 1.53E-05 | 18.58  | 17.02   | 33.27   | 19.55    | 9     | 5    |
| 481 | ALA   | ASP    | 4.39E-06 | 18.58  | 19.21   | 33.27   | 24.15    | 9     | 5    |
| 514 | LEU   | PHE    | 1.53E-05 | 18.57  | 18.19   | 33.43   | 0        | 11    | 5    |
| 593 | GLY   | TRP    | 4.78E-06 | 18.66  | 18.83   | 33.47   | 0        | 16    | 5    |
| 593 | GLY   | LEU    | 3.87E-07 | 18.66  | 19.35   | 33.47   | -237.44  | 16    | 5    |
| 463 | ILE   | HIE    | 5.14E-06 | 18.60  | 18.06   | 33.42   | 30.11    | 4     | 6    |
| 463 | ILE   | HID    | 5.14E-06 | 18.60  | 18.08   | 33.42   | 30.75    | 4     | 6    |
| 466 | GLY   | PRO    | 1.77E-07 | 18.80  | 18.27   | 33.48   | 0        | 1     | 6    |
| 471 | VAL   | PRO    | 5.74E-07 | 18.65  | 17.88   | 33.41   | 0        | 4     | 6    |
| 471 | VAL   | GLU    | 9.01E-07 | 18.65  | 18.82   | 33.41   | 31.34    | 4     | 6    |
| 481 | ALA   | GLN    | 1.8E-06  | 18.58  | 18.37   | 33.27   | -15.45   | 9     | 6    |
| 514 | LEU   | HIP    | 3.37E-07 | 18.57  | 17.68   | 33.43   | 25.66    | 11    | 6    |
| 514 | LEU   | HID    | 3.37E-07 | 18.57  | 17.72   | 33.43   | 25.78    | 11    | 6    |
| 514 | LEU   | GLY    | 3.88E-08 | 18.57  | 18.03   | 33.43   | 30.29    | 11    | 6    |
| 514 | LEU   | ALA    | 9.24E-07 | 18.57  | 18.09   | 33.43   | 30.82    | 11    | 6    |
| 516 | PHE   | ARG    | 4.47E-06 | 18.59  | 18.58   | 33.51   | 29.7     | 1     | 6    |
| 529 | THR   | TYR    | 1.12E-06 | 18.58  | 18.58   | 33.45   | -114.94  | 10    | 6    |
| 529 | THR   | ARG    | 4.98E-07 | 18.58  | 18.6    | 33.45   | -34.39   | 10    | 6    |
| 529 | THR   | LYS    | 1.74E-06 | 18.58  | 18.57   | 33.45   | -7.92    | 10    | 6    |
| 529 | THR   | LEU    | 3.1E-06  | 18.58  | 18.56   | 33.45   | 28.04    | 10    | 6    |
| 532 | CYS   | HIP    | 4.44E-06 | 18.49  | 14.51   | 33.28   | -0.94    | 9     | 6    |
| 532 | CYS   | HIE    | 4.44E-06 | 18.49  | 12.48   | 33.28   | -2.8     | 9     | 6    |
| 532 | CYS   | ILE    | 1.16E-06 | 18.49  | 18.82   | 33.28   | 27.39    | 9     | 6    |
| 532 | CYS   | VAL    | 2.11E-06 | 18.49  | 18.7    | 33.28   | 29.58    | 9     | 6    |
| 463 | ILE   | HIP    | 5.14E-06 | 18.60  | 17.51   | 33.42   | 30.23    | 4     | 7    |
| 505 | LEU   | MET    | 3.58E-07 | 18.59  | 18.6    | 33.45   | 25.88    | 3     | 7    |
| 514 | LEU   | HIE    | 3.37E-07 | 18.57  | 17.72   | 33.43   | 25.91    | 11    | 7    |
| 529 | THR   | HIE    | 6.68E-08 | 18.58  | 18.58   | 33.45   | 10.11    | 10    | 7    |
| 531 | TRP   | PRO    | 5.44E-07 | 18.51  | 16.76   | 33.25   | 0        | 1     | 7    |
| 532 | CYS   | HID    | 4.44E-06 | 18.49  | 14.39   | 33.28   | -0.66    | 9     | 7    |
| 532 | CYS   | THR    | 2.67E-07 | 18.49  | 18.32   | 33.28   | 30.91    | 9     | 7    |
| 514 | LEU   | GLU    | 5.81E-08 | 18.57  | 17.36   | 33.43   | 28       | 11    | 8    |
| 529 | THR   | HIP    | 6.68E-08 | 18.58  | 18.58   | 33.45   | 10.86    | 10    | 8    |
| 529 | THR   | HID    | 6.68E-08 | 18.58  | 18.58   | 33.45   | 11.36    | 10    | 8    |

Table S6: All RESISTOR resistance mutation predictions for BRAF with encorafenib. “Pos” is the position of the residue. “WT AA” is the wildtype identity of the amino acid. “Mut AA” is the resistance mutation. “Sig Prob” is the mutational signature probability for the mutation from “WT AA” to “Mut AA” in melanoma. “ATP WT” and “ATP Mut” are the  $K^*$  scores of the endogenous ligand with the wildtype and mutant residues, respectively. “Drug WT” and “Drug Mut” are the  $K^*$  scores of encorafenib with the wildtype and mutant residues, respectively. “Count” is number of resistance mutations at the position. “Rank” is the Pareto rank of the mutation. Note:  $K^*$  scores are in  $\log_{10}$  units where possible and 0 where there is predicted to be no binding. The complete set of inputs used for the Pareto ranking can be found in Data S6.

| Pos | WT AA | Mut AA | Sig Prob | ATP WT | ATP Mut | Drug WT | Drug Mut | Count | Rank |
|-----|-------|--------|----------|--------|---------|---------|----------|-------|------|
| 471 | VAL   | LEU    | 0.000443 | 18.65  | 19.67   | 38.16   | 28.68    | 10    | 1    |
| 481 | ALA   | LEU    | 7.06E-05 | 18.58  | 18.68   | 38.13   | -24.05   | 8     | 1    |
| 481 | ALA   | GLU    | 0.00121  | 18.58  | 17.92   | 38.13   | 10.6     | 8     | 1    |
| 529 | THR   | ILE    | 0.0202   | 18.58  | 18.57   | 38.12   | 31.23    | 12    | 1    |
| 532 | CYS   | ARG    | 0.000812 | 18.49  | 13.04   | 38.06   | -19.78   | 9     | 1    |
| 535 | SER   | PRO    | 0.0013   | 18.72  | 18.65   | 38.18   | 0        | 1     | 1    |
| 593 | GLY   | TYR    | 3.58E-05 | 18.66  | 19.86   | 38.09   | 0        | 17    | 1    |
| 593 | GLY   | ARG    | 0.00078  | 18.66  | 16.17   | 38.09   | -2.33    | 17    | 1    |
| 593 | GLY   | ILE    | 4.55E-05 | 18.66  | 19.8    | 38.09   | 2.23     | 17    | 1    |
| 593 | GLY   | VAL    | 0.000935 | 18.66  | 19.18   | 38.09   | 7.05     | 17    | 1    |
| 593 | GLY   | ASN    | 0.00134  | 18.66  | 19.16   | 38.09   | 28.19    | 17    | 1    |
| 593 | GLY   | ASP    | 0.0163   | 18.66  | 18.89   | 38.09   | 28.87    | 17    | 1    |
| 593 | GLY   | PHE    | 1.99E-06 | 18.66  | 20.07   | 38.09   | 30.05    | 17    | 1    |
| 593 | GLY   | CYS    | 0.00166  | 18.66  | 19.06   | 38.09   | 34.56    | 17    | 1    |
| 593 | GLY   | SER    | 0.0609   | 18.66  | 18.83   | 38.09   | 35.04    | 17    | 1    |
| 471 | VAL   | PHE    | 0.000785 | 18.65  | 16.37   | 38.16   | 26       | 10    | 2    |
| 481 | ALA   | LYS    | 0.000274 | 18.58  | 17.32   | 38.13   | 7.23     | 8     | 2    |
| 514 | LEU   | ARG    | 5.22E-05 | 18.57  | 17.18   | 38.14   | 20.73    | 10    | 2    |
| 529 | THR   | MET    | 1.74E-05 | 18.58  | 18.65   | 38.12   | -18.87   | 12    | 2    |
| 529 | THR   | PHE    | 3.77E-05 | 18.58  | 15.91   | 38.12   | 0.72     | 12    | 2    |
| 529 | THR   | ASN    | 0.000996 | 18.58  | 18.55   | 38.12   | 33.77    | 12    | 2    |
| 536 | SER   | ASN    | 0.0137   | 18.63  | 18.53   | 38.02   | 34.35    | 3     | 2    |
| 583 | PHE   | TYR    | 0.00408  | 18.60  | 18.68   | 38.10   | 29.81    | 9     | 2    |
| 593 | GLY   | HIE    | 1.66E-05 | 18.66  | 19.58   | 38.09   | 0        | 17    | 2    |
| 593 | GLY   | GLU    | 0.000276 | 18.66  | 18.73   | 38.09   | 22.97    | 17    | 2    |
| 593 | GLY   | THR    | 2.67E-05 | 18.66  | 19.06   | 38.09   | 24.19    | 17    | 2    |
| 593 | GLY   | ALA    | 0.000254 | 18.66  | 18.8    | 38.09   | 35.61    | 17    | 2    |
| 463 | ILE   | TYR    | 2.55E-05 | 18.60  | 15.94   | 38.08   | 9.07     | 3     | 3    |
| 481 | ALA   | ILE    | 5.14E-05 | 18.58  | 14.2    | 38.13   | 30.63    | 8     | 3    |
| 481 | ALA   | VAL    | 0.00146  | 18.58  | 17.77   | 38.13   | 34.23    | 8     | 3    |
| 505 | LEU   | HIP    | 0.00146  | 18.59  | 18.59   | 38.08   | 35.98    | 2     | 3    |
| 514 | LEU   | GLN    | 8.77E-05 | 18.57  | 17.02   | 38.14   | 31.64    | 10    | 3    |
| 536 | SER   | ASP    | 5.03E-05 | 18.63  | 18.21   | 38.02   | 33.54    | 3     | 3    |
| 583 | PHE   | VAL    | 0.000214 | 18.60  | 17.05   | 38.10   | 33.2     | 9     | 3    |
| 583 | PHE   | ILE    | 0.00316  | 18.60  | 17.45   | 38.10   | 34.49    | 9     | 3    |
| 583 | PHE   | SER    | 0.00262  | 18.60  | 16.86   | 38.10   | 34.31    | 9     | 3    |
| 593 | GLY   | HIP    | 1.66E-05 | 18.66  | 19.56   | 38.09   | 0        | 17    | 3    |
| 505 | LEU   | HID    | 0.00146  | 18.59  | 18.59   | 38.08   | 36.08    | 2     | 4    |
| 593 | GLY   | HID    | 1.66E-05 | 18.66  | 19.55   | 38.09   | 0        | 17    | 4    |



| Pos | WT AA | Mut AA | Sig Prob | ATP WT | ATP Mut | Drug WT | Drug Mut | Count | Rank |
|-----|-------|--------|----------|--------|---------|---------|----------|-------|------|
| 471 | VAL   | PRO    | 5.74E-07 | 18.65  | 17.88   | 38.16   | 0        | 10    | 5    |
| 471 | VAL   | ARG    | 3.03E-07 | 18.65  | 18.99   | 38.16   | 18.89    | 10    | 5    |
| 471 | VAL   | MET    | 8.44E-06 | 18.65  | 18.96   | 38.16   | 21.35    | 10    | 5    |
| 481 | ALA   | GLN    | 1.8E-06  | 18.58  | 18.37   | 38.13   | -7.07    | 8     | 5    |
| 481 | ALA   | ARG    | 1.53E-05 | 18.58  | 17.02   | 38.13   | 1.87     | 8     | 5    |
| 481 | ALA   | ASP    | 4.39E-06 | 18.58  | 19.21   | 38.13   | 30.87    | 8     | 5    |
| 514 | LEU   | PHE    | 1.53E-05 | 18.57  | 18.19   | 38.14   | -25.54   | 10    | 5    |
| 529 | THR   | ARG    | 4.98E-07 | 18.58  | 18.6    | 38.12   | -6.65    | 12    | 5    |
| 532 | CYS   | HIP    | 4.44E-06 | 18.49  | 14.51   | 38.06   | -40.5    | 9     | 5    |
| 532 | CYS   | HIE    | 4.44E-06 | 18.49  | 12.48   | 38.06   | -40.74   | 9     | 5    |
| 533 | GLU   | PRO    | 3.22E-07 | 18.58  | 18.63   | 38.12   | 0        | 1     | 5    |
| 593 | GLY   | LEU    | 3.87E-07 | 18.66  | 19.35   | 38.09   | 19.61    | 17    | 5    |
| 593 | GLY   | TRP    | 4.78E-06 | 18.66  | 18.83   | 38.09   | 19.1     | 17    | 5    |
| 463 | ILE   | HIE    | 5.14E-06 | 18.60  | 18.06   | 38.08   | 35.28    | 3     | 6    |
| 471 | VAL   | GLU    | 9.01E-07 | 18.65  | 18.82   | 38.16   | 35.77    | 10    | 6    |
| 529 | THR   | TYR    | 1.12E-06 | 18.58  | 18.58   | 38.12   | 19.14    | 12    | 6    |
| 529 | THR   | LYS    | 1.74E-06 | 18.58  | 18.57   | 38.12   | 20.27    | 12    | 6    |
| 529 | THR   | HIE    | 6.68E-08 | 18.58  | 18.58   | 38.12   | 21.51    | 12    | 6    |
| 529 | THR   | LEU    | 3.1E-06  | 18.58  | 18.56   | 38.12   | 22.42    | 12    | 6    |
| 531 | TRP   | PRO    | 5.44E-07 | 18.51  | 16.76   | 38.04   | 0        | 1     | 6    |
| 532 | CYS   | HID    | 4.44E-06 | 18.49  | 14.39   | 38.06   | -40.35   | 9     | 6    |
| 532 | CYS   | ILE    | 1.16E-06 | 18.49  | 18.82   | 38.06   | 30.25    | 9     | 6    |
| 532 | CYS   | VAL    | 2.11E-06 | 18.49  | 18.7    | 38.06   | 30.4     | 9     | 6    |
| 583 | PHE   | ARG    | 5.91E-06 | 18.60  | 17.17   | 38.10   | 32.32    | 9     | 6    |
| 583 | PHE   | THR    | 1.13E-05 | 18.60  | 16.91   | 38.10   | 32.78    | 9     | 6    |
| 583 | PHE   | MET    | 5.94E-06 | 18.60  | 18.39   | 38.10   | 35.48    | 9     | 6    |
| 463 | ILE   | HID    | 5.14E-06 | 18.60  | 18.08   | 38.08   | 35.51    | 3     | 7    |
| 471 | VAL   | HIP    | 6.58E-07 | 18.65  | 17.42   | 38.16   | 30.52    | 10    | 7    |
| 471 | VAL   | HID    | 6.58E-07 | 18.65  | 17.61   | 38.16   | 31.08    | 10    | 7    |
| 471 | VAL   | TYR    | 1.33E-06 | 18.65  | 16.37   | 38.16   | 31.46    | 10    | 7    |
| 514 | LEU   | HIP    | 3.37E-07 | 18.57  | 17.68   | 38.14   | 31.73    | 10    | 7    |
| 514 | LEU   | HID    | 3.37E-07 | 18.57  | 17.72   | 38.14   | 31.87    | 10    | 7    |
| 514 | LEU   | LYS    | 1.68E-06 | 18.57  | 17.37   | 38.14   | 33.97    | 10    | 7    |
| 514 | LEU   | MET    | 2.51E-06 | 18.57  | 18.42   | 38.14   | 35.5     | 10    | 7    |
| 529 | THR   | HID    | 6.68E-08 | 18.58  | 18.58   | 38.12   | 20.75    | 12    | 7    |
| 529 | THR   | ASP    | 2.37E-06 | 18.58  | 18.51   | 38.12   | 34.9     | 12    | 7    |
| 536 | SER   | LEU    | 5.47E-07 | 18.63  | 17.44   | 38.02   | 30.59    | 3     | 7    |
| 583 | PHE   | TRP    | 9.45E-07 | 18.60  | 13.08   | 38.10   | 24.17    | 9     | 7    |
| 583 | PHE   | GLY    | 1.52E-06 | 18.60  | 16.63   | 38.10   | 33.81    | 9     | 7    |
| 471 | VAL   | HIE    | 6.58E-07 | 18.65  | 17.28   | 38.16   | 30.93    | 10    | 8    |
| 514 | LEU   | HIE    | 3.37E-07 | 18.57  | 17.72   | 38.14   | 32.04    | 10    | 8    |
| 529 | THR   | HIP    | 6.68E-08 | 18.58  | 18.58   | 38.12   | 20.97    | 12    | 8    |
| 532 | CYS   | THR    | 2.67E-07 | 18.49  | 18.32   | 38.06   | 35.12    | 9     | 8    |
| 514 | LEU   | GLU    | 5.81E-08 | 18.57  | 17.36   | 38.14   | 32.45    | 10    | 9    |
| 514 | LEU   | GLY    | 3.88E-08 | 18.57  | 18.03   | 38.14   | 35.47    | 10    | 9    |

Table S7: All RESISTOR resistance mutation predictions for BRAF with PLX8394. “Pos” is the position of the residue. “WT AA” is the wildtype identity of the amino acid. “Mut AA” is the resistance mutation. “Sig Prob” is the mutational signature probability for the mutation from “WT AA” to “Mut AA” in melanoma. “ATP WT” and “ATP Mut” are the  $K^*$  scores of the endogenous ligand with the wildtype and mutant residues, respectively. “Drug WT” and “Drug Mut” are the  $K^*$  scores of PLX8394 with the wildtype and mutant residues, respectively. “Count” is number of resistance mutations at the position. “Rank” is the Pareto rank of the mutation. Note:  $K^*$  scores are in  $\log_{10}$  units where possible and 0 where there is predicted to be no binding. The complete set of inputs used for the Pareto ranking can be found in Data S7.

| Pos | WT AA | Mut AA | Sig Prob | ATP WT | ATP Mut | Drug WT | Drug Mut | Count | Rank |
|-----|-------|--------|----------|--------|---------|---------|----------|-------|------|
| 471 | VAL   | LEU    | 0.000443 | 18.645 | 19.67   | 31.624  | 29.38    | 3     | 1    |
| 513 | ILE   | PHE    | 0.00146  | 18.569 | 18.57   | 31.663  | 0        | 1     | 1    |
| 529 | THR   | ILE    | 0.0202   | 18.583 | 18.57   | 32.196  | 12.61    | 14    | 1    |
| 535 | SER   | PRO    | 0.0013   | 18.717 | 18.65   | 31.813  | 0        | 5     | 1    |
| 535 | SER   | LEU    | 0.00156  | 18.717 | 19.09   | 31.813  | 24.04    | 5     | 1    |
| 593 | GLY   | PHE    | 1.99E-06 | 18.659 | 20.07   | 31.991  | 0        | 16    | 1    |
| 593 | GLY   | TYR    | 3.58E-05 | 18.659 | 19.86   | 31.991  | 0        | 16    | 1    |
| 593 | GLY   | ARG    | 0.00078  | 18.659 | 16.17   | 31.991  | -248.98  | 16    | 1    |
| 593 | GLY   | GLU    | 0.000276 | 18.659 | 18.73   | 31.991  | -61.35   | 16    | 1    |
| 593 | GLY   | ASN    | 0.00134  | 18.659 | 19.16   | 31.991  | -56.56   | 16    | 1    |
| 593 | GLY   | ASP    | 0.0163   | 18.659 | 18.89   | 31.991  | -29.16   | 16    | 1    |
| 593 | GLY   | VAL    | 0.000935 | 18.659 | 19.18   | 31.991  | 6.66     | 16    | 1    |
| 593 | GLY   | CYS    | 0.00166  | 18.659 | 19.06   | 31.991  | 12.77    | 16    | 1    |
| 593 | GLY   | ILE    | 4.55E-05 | 18.659 | 19.8    | 31.991  | 22.76    | 16    | 1    |
| 593 | GLY   | SER    | 0.0609   | 18.659 | 18.83   | 31.991  | 28.13    | 16    | 1    |
| 463 | ILE   | TYR    | 2.55E-05 | 18.596 | 15.94   | 31.621  | -260.1   | 5     | 2    |
| 481 | ALA   | LEU    | 7.06E-05 | 18.575 | 18.68   | 32.195  | 2.47     | 8     | 2    |
| 481 | ALA   | LYS    | 0.000274 | 18.575 | 17.32   | 32.195  | 3.05     | 8     | 2    |
| 481 | ALA   | GLU    | 0.00121  | 18.575 | 17.92   | 32.195  | 12.04    | 8     | 2    |
| 505 | LEU   | ARG    | 0.000861 | 18.589 | 18.58   | 31.429  | 24.96    | 4     | 2    |
| 508 | THR   | ARG    | 0.000295 | 18.594 | 18.59   | 31.461  | -115.96  | 2     | 2    |
| 508 | THR   | LYS    | 0.000916 | 18.594 | 18.59   | 31.461  | 12.12    | 2     | 2    |
| 514 | LEU   | ILE    | 0.00165  | 18.57  | 18.4    | 31.667  | 21.52    | 10    | 2    |
| 514 | LEU   | ARG    | 5.22E-05 | 18.57  | 17.18   | 31.667  | 21.09    | 10    | 2    |
| 529 | THR   | PHE    | 3.77E-05 | 18.583 | 15.91   | 32.196  | -106.19  | 14    | 2    |
| 529 | THR   | MET    | 1.74E-05 | 18.583 | 18.65   | 32.196  | -28.68   | 14    | 2    |
| 529 | THR   | VAL    | 4.99E-05 | 18.583 | 18.72   | 32.196  | 28.05    | 14    | 2    |
| 529 | THR   | ASN    | 0.000996 | 18.583 | 18.55   | 32.196  | 27.98    | 14    | 2    |
| 532 | CYS   | ARG    | 0.000812 | 18.49  | 13.04   | 31.578  | -0.71    | 9     | 2    |
| 535 | SER   | ILE    | 0.000391 | 18.717 | 19.02   | 31.813  | 28.17    | 5     | 2    |
| 535 | SER   | TYR    | 0.00262  | 18.717 | 18.68   | 31.813  | 29.19    | 5     | 2    |
| 593 | GLY   | HIE    | 1.66E-05 | 18.659 | 19.58   | 31.991  | 0        | 16    | 2    |
| 593 | GLY   | THR    | 2.67E-05 | 18.659 | 19.06   | 31.991  | 6.63     | 16    | 2    |
| 471 | VAL   | PHE    | 0.000785 | 18.645 | 16.37   | 31.624  | 27.32    | 3     | 3    |
| 481 | ALA   | ILE    | 5.14E-05 | 18.575 | 14.2    | 32.195  | 16.28    | 8     | 3    |
| 481 | ALA   | VAL    | 0.00146  | 18.575 | 17.77   | 32.195  | 27.92    | 8     | 3    |
| 514 | LEU   | VAL    | 0.000522 | 18.57  | 18.3    | 31.667  | 27.8     | 10    | 3    |
| 514 | LEU   | PRO    | 0.00121  | 18.57  | 18.12   | 31.667  | 29.31    | 10    | 3    |
| 593 | GLY   | HIP    | 1.66E-05 | 18.659 | 19.56   | 31.991  | 0        | 16    | 3    |

| Pos | WT AA | Mut AA | Sig Prob | ATP WT | ATP Mut | Drug WT | Drug Mut | Count | Rank |
|-----|-------|--------|----------|--------|---------|---------|----------|-------|------|
| 593 | GLY   | HID    | 1.66E-05 | 18.659 | 19.55   | 31.991  | 0        | 16    | 4    |
| 471 | VAL   | MET    | 8.44E-06 | 18.645 | 18.96   | 31.624  | 30.12    | 3     | 5    |
| 481 | ALA   | ARG    | 1.53E-05 | 18.575 | 17.02   | 32.195  | -7       | 8     | 5    |
| 481 | ALA   | ASP    | 4.39E-06 | 18.575 | 19.21   | 32.195  | 26.65    | 8     | 5    |
| 505 | LEU   | TYR    | 8.68E-06 | 18.589 | 18.59   | 31.429  | 13.95    | 4     | 5    |
| 514 | LEU   | PHE    | 1.53E-05 | 18.57  | 18.19   | 31.667  | 0        | 10    | 5    |
| 535 | SER   | ARG    | 1.91E-06 | 18.717 | 18.84   | 31.813  | 26.28    | 5     | 5    |
| 593 | GLY   | TRP    | 4.78E-06 | 18.659 | 18.83   | 31.991  | 0        | 16    | 5    |
| 593 | GLY   | LEU    | 3.87E-07 | 18.659 | 19.35   | 31.991  | -172.14  | 16    | 5    |
| 463 | ILE   | HIE    | 5.14E-06 | 18.596 | 18.06   | 31.621  | 14.78    | 5     | 6    |
| 463 | ILE   | HIP    | 5.14E-06 | 18.596 | 17.51   | 31.621  | 14.5     | 5     | 6    |
| 463 | ILE   | HID    | 5.14E-06 | 18.596 | 18.08   | 31.621  | 23.91    | 5     | 6    |
| 481 | ALA   | GLN    | 1.8E-06  | 18.575 | 18.37   | 32.195  | -57.06   | 8     | 6    |
| 516 | PHE   | THR    | 3.77E-06 | 18.593 | 18.56   | 32.276  | 29.08    | 1     | 6    |
| 528 | VAL   | ARG    | 5.57E-07 | 18.569 | 18.61   | 32.223  | 21.75    | 1     | 6    |
| 529 | THR   | TYR    | 1.12E-06 | 18.583 | 18.58   | 32.196  | 0        | 14    | 6    |
| 529 | THR   | ARG    | 4.98E-07 | 18.583 | 18.6    | 32.196  | -73.94   | 14    | 6    |
| 529 | THR   | LEU    | 3.1E-06  | 18.583 | 18.56   | 32.196  | -40.25   | 14    | 6    |
| 529 | THR   | LYS    | 1.74E-06 | 18.583 | 18.57   | 32.196  | -16.49   | 14    | 6    |
| 532 | CYS   | HIP    | 4.44E-06 | 18.49  | 14.51   | 31.578  | 10.43    | 9     | 6    |
| 532 | CYS   | HIE    | 4.44E-06 | 18.49  | 12.48   | 31.578  | 8.45     | 9     | 6    |
| 532 | CYS   | ILE    | 1.16E-06 | 18.49  | 18.82   | 31.578  | 28.7     | 9     | 6    |
| 532 | CYS   | VAL    | 2.11E-06 | 18.49  | 18.7    | 31.578  | 29       | 9     | 6    |
| 505 | LEU   | MET    | 3.58E-07 | 18.589 | 18.6    | 31.429  | 28.4     | 4     | 7    |
| 505 | LEU   | GLN    | 1.84E-06 | 18.589 | 18.6    | 31.429  | 29.15    | 4     | 7    |
| 514 | LEU   | HIP    | 3.37E-07 | 18.57  | 17.68   | 31.667  | 24.27    | 10    | 7    |
| 514 | LEU   | HIE    | 3.37E-07 | 18.57  | 17.72   | 31.667  | 24.93    | 10    | 7    |
| 514 | LEU   | HID    | 3.37E-07 | 18.57  | 17.72   | 31.667  | 25.66    | 10    | 7    |
| 529 | THR   | HIP    | 6.68E-08 | 18.583 | 18.58   | 32.196  | -75.31   | 14    | 7    |
| 529 | THR   | HID    | 6.68E-08 | 18.583 | 18.58   | 32.196  | -74.57   | 14    | 7    |
| 529 | THR   | HIE    | 6.68E-08 | 18.583 | 18.58   | 32.196  | -73.8    | 14    | 7    |
| 529 | THR   | ASP    | 2.37E-06 | 18.583 | 18.51   | 32.196  | 27.31    | 14    | 7    |
| 529 | THR   | CYS    | 1.13E-07 | 18.583 | 18.53   | 32.196  | 29.46    | 14    | 7    |
| 531 | TRP   | PRO    | 5.44E-07 | 18.512 | 16.76   | 31.57   | 0        | 1     | 7    |
| 532 | CYS   | HID    | 4.44E-06 | 18.49  | 14.39   | 31.578  | 10.57    | 9     | 7    |
| 514 | LEU   | GLU    | 5.81E-08 | 18.57  | 17.36   | 31.667  | 26.07    | 10    | 8    |
| 514 | LEU   | LYS    | 1.68E-06 | 18.57  | 17.37   | 31.667  | 28.06    | 10    | 8    |

### S3. Predictive Contributions of the Individual Parameters

RESISTOR optimizes four criteria,  $K^*$  positive design,  $K^*$  negative design, mutational probability, and hotspot cardinality. To further investigate the contributions of each criterion, we ran a computational ablation study on EGFR resistance to osimertinib. We first describe the contributions of the structure- and sequence-based criteria to pruning the mutational sequence space. We then describe how we omitted each of the four objectives, one-at-a-time, and recomputed each mutant’s Pareto rank using the three remaining objectives. To disambiguate between RESISTOR with four criteria and the results of this computational ablation study, we denote the later as 3-RANK. We compared RESISTOR and 3-RANK’s results to see whether using 3-RANK could improve the predictions.

Note that 3-RANK is, by nature, an imperfect comparison to RESISTOR because an ablation study should remove each criterion from both the pruning and the ranking steps. As described above, RESISTOR consists of two components, *viz.*, a pruning and a Pareto-ranking step. We considered an ablation study where each of the criteria is removed from both the pruning and ranking steps. However, by applying the cut-off  $c$  (described in Section 2.4), we combine positive and negative design in a nonlinear fashion, and it is therefore not possible to remove them individually. In addition, the residue hotspot cardinality is a result of the pruning, and can thus not be ablated from the pruning. To account for these limitations, we describe below first the magnitude of the effect of each of the three pruning criteria (the ratio of positive to negative design, loss of wildtype clonal fitness, and mutational probability) on the pruning step, and then describe how each of the criteria, when ablated solely from the ranking step, affects the ranking step (assuming full RESISTOR pruning has already occurred).

There were two structure-based pruning criteria, namely the resistance cut-off and loss of wildtype clonal fitness via ablated endogenous ligand binding as described in Section 2.4. These two criteria prune the largest proportion of sequences, accounting for the removal of  $86.24 \pm 3.20\%$  of mutants in the EGFR and BRAF case studies. Removing all mutations with a mutational signature-derived probability of zero removes an additional  $3.58 \pm 0.87\%$  of mutants. However, we have applied consecutive filtering steps here, and if we look at each parameter in this particular EGFR dataset individually, the cut-off  $c$  alone prunes  $51.03 \pm 5.97\%$  of mutants, ablated endogenous ligand binding prunes  $37.20 \pm 6.18\%$  of mutants, and mutations with a mutational probability of zero alone prunes  $19.21 \pm 0.70\%$  of mutants. This shows that the structure based criteria prune the overwhelming majority of the candidate sequences. In this particular EGFR:osimertinib case, after pruning there remain 36 out of the original 357 candidate sequences that we then ranked using Pareto optimization.

In Table 1, we list RESISTOR’s correct predictions for EGFR. There are five correct predictions for resistance mutations in EGFR when treated with osimertinib: L792H, G796R, G796D, G796C, and G796S. RESISTOR predicted L792H to be in the second Pareto rank and the four mutations at position 796 to be on the Pareto frontier. In comparing the RESISTOR ranks to the 3-RANK results, we found that omitting an objective with 3-RANK never improved the predictive accuracy (see Table S8 for the full results).

Being clinically confirmed resistance mutations, ideally 5 of the mutants should be on the Pareto frontier, *i.e.*, have a Pareto rank of 1. 3-RANK that omits the  $K^*$  score of the EGFR:wildtype ligand complex changed G796C’s Pareto rank from 1 to 2, and increased the ranks to 3 and 4 respectively of the HIE and HIP protonation states of L792H. 3-RANK that omits the  $K^*$  score of the EGFR:osimertinib complex reduced G796D’s Pareto rank from 1 to 2, and reduced the HIP, HIE, and HID 792H protonation states from a Pareto rank of 2 to 5, 4, and 3, respectively. The largest reduction in rank accuracy is when 3-RANK omits mutational probabilities. In this case, L796R, L796D, L796C, and L796S have their Pareto ranks reduced from 1 to 2, 5, 6, and 8. The L792H mutation, in all protonation states, has its Pareto rank reduced from 2 to 9. On the other hand, when 3-RANK omits hotspot cardinality the Pareto ranks of the clinically confirmed resistance mutants remain the same RESISTOR. This is not too surprising, as hotspot cardinality is a count of the number of amino acids at a particular location that are predicted by  $K^*$  positive and negative design,

as well mutational probability, to confer resistance. It is thus dependent on the other three criteria, and in essence boosts locations that are predicted to be critical for drug or endogenous ligand binding. This indicates that in the future it might be possible to omit hotspot cardinality with only a minor drop in predictive accuracy.

In summary, positive design, negative design, and mutational probability all affect the pruning step, with the structural components most aggressively pruning the candidate resistance mutations. In the ranking step, the omission of positive design, negative design, or mutational probability in the Pareto optimization all negatively impact the accuracy of the results. Hotspot cardinality has a smaller effect on the predicted rankings than the other three criteria.

Table S8: Pareto ranks of computational Pareto objective ablation study on EGFR:osimertinib. Every mutation in this table is predicted to confer resistance. “Pos” is the position of the residue. “WT AA” is the wildtype identity of the amino acid. “Mut AA” is the resistance mutation. “Rank” is the RESISTOR-computed Pareto rank. “w/o (+) Design” is the Pareto rank of the mutation when the  $K^*$  score of the wildtype ligand (ATP) is omitted from the Pareto optimization. “w/o (-) Design” is the Pareto rank of the mutation when the  $K^*$  score of the drug (osimertinib) is omitted from the Pareto optimization. “w/o Probs” is the Pareto rank of the mutation when the mutational probability is omitted from the Pareto optimization. “w/o Count” is the Pareto rank of the mutation when the hotspot cardinality is omitted from the Pareto optimization.

| Pos | WT AA | Mut AA | Rank | w/o (+) Design | w/o (-) Design | w/o Probs | w/o Count |
|-----|-------|--------|------|----------------|----------------|-----------|-----------|
| 718 | leu   | TRP    | 1    | 2              | 6              | 1         | 2         |
| 718 | leu   | PHE    | 1    | 1              | 6              | 2         | 1         |
| 718 | leu   | HIP    | 1    | 1              | 5              | 3         | 1         |
| 718 | leu   | HIE    | 1    | 2              | 3              | 3         | 1         |
| 718 | leu   | MET    | 1    | 1              | 1              | 5         | 1         |
| 719 | gly   | VAL    | 1    | 1              | 1              | 7         | 1         |
| 726 | val   | TRP    | 1    | 2              | 2              | 1         | 1         |
| 743 | ala   | ASP    | 1    | 1              | 1              | 6         | 1         |
| 796 | gly   | TRP    | 1    | 1              | 5              | 1         | 2         |
| 796 | gly   | TYR    | 1    | 1              | 2              | 1         | 2         |
| 796 | gly   | PHE    | 1    | 1              | 2              | 2         | 1         |
| 796 | gly   | LEU    | 1    | 2              | 1              | 1         | 1         |
| 796 | gly   | ARG    | 1    | 1              | 1              | 2         | 1         |
| 796 | gly   | ASP    | 1    | 1              | 2              | 5         | 1         |
| 796 | gly   | CYS    | 1    | 2              | 1              | 6         | 1         |
| 796 | gly   | SER    | 1    | 1              | 1              | 8         | 1         |
| 718 | leu   | HID    | 2    | 3              | 4              | 4         | 2         |
| 718 | leu   | ARG    | 2    | 2              | 2              | 5         | 2         |
| 723 | phe   | ILE    | 2    | 5              | 2              | 3         | 2         |
| 792 | leu   | HIP    | 2    | 2              | 5              | 9         | 2         |
| 792 | leu   | HIE    | 2    | 3              | 4              | 9         | 2         |
| 792 | leu   | HID    | 2    | 4              | 3              | 9         | 2         |
| 796 | gly   | GLU    | 2    | 2              | 3              | 3         | 3         |
| 796 | gly   | HIE    | 2    | 3              | 2              | 2         | 2         |
| 796 | gly   | ASN    | 2    | 3              | 3              | 5         | 2         |
| 718 | leu   | LYS    | 3    | 4              | 3              | 8         | 3         |
| 719 | gly   | THR    | 3    | 5              | 6              | 6         | 4         |
| 726 | val   | ARG    | 3    | 5              | 6              | 6         | 5         |
| 726 | val   | LYS    | 3    | 5              | 7              | 7         | 4         |
| 743 | ala   | GLU    | 3    | 4              | 7              | 5         | 3         |

| Pos | WT AA | Mut AA | Rank | w/o (+) Design | w/o (-) Design | w/o Probs | w/o Count |
|-----|-------|--------|------|----------------|----------------|-----------|-----------|
| 796 | gly   | HID    | 3    | 4              | 3              | 3         | 3         |
| 796 | gly   | THR    | 3    | 4              | 4              | 7         | 3         |
| 844 | leu   | TRP    | 3    | 6              | 6              | 7         | 3         |
| 796 | gly   | HIP    | 4    | 5              | 4              | 4         | 4         |
| 718 | leu   | GLY    | 5    | 6              | 6              | 8         | 5         |
| 743 | ala   | ARG    | 5    | 6              | 8              | 5         | 5         |
